# Supplementary material
Source: PubMed Central journal article supplement (PMC7745740)
Supplement: NIHMS1649726-supplement-Supplemental_info.pdf [file NIHMS1649726-supplement-Supplemental_info.pdf]

## SUPPORTING INFORMATION

Contents:

Pages S1 S3: Analyses of derivatives **6a-l** and **7a-m**.

### Analyses

| Compd     | Elemental Analyses Calculated/ Found |      |      |      |
|-----------|--------------------------------------|------|------|------|
|           | C                                    | H    | N    | F    |
| <b>6a</b> | 70.22                                | 5.12 | 3.56 | 4.83 |
|           | 70.29                                | 4.97 | 3.30 | 4.88 |
| <b>6b</b> | 70.75                                | 5.44 | 3.44 | 4.66 |
|           | 70.61                                | 5.57 | 3.41 | 4.80 |
| <b>6c</b> | 64.35                                | 5.08 | 4.41 | 5.99 |
|           | 64.35                                | 5.36 | 4.55 | 6.03 |
| <b>6d</b> | 70.40                                | 5.39 | 7.14 | 4.84 |
|           | 70.20                                | 5.25 | 7.39 | 4.79 |
| <b>6e</b> | 69.79                                | 4.96 | 3.13 | 4.25 |
|           | 69.53                                | 4.99 | 3.20 | 4.19 |

|           |       |      |      |      |
|-----------|-------|------|------|------|
| <b>6f</b> | 69.28 | 4.65 | 3.23 | 4.38 |
|           | 69.61 | 4.93 | 3.30 | 4.51 |
| <b>6g</b> | 64.69 | 4.89 | 3.77 | 5.12 |
|           | 64.65 | 5.08 | 3.87 | 4.90 |
| <b>6h</b> | 71.59 | 5.29 | 3.34 | 4.53 |
|           | 71.61 | 5.34 | 3.29 | 4.51 |
| <b>6i</b> | 66.46 | 5.28 | 4.08 | 5.53 |
|           | 66.50 | 5.20 | 3.99 | 5.61 |
| <b>6j</b> | 71.59 | 5.29 | 3.34 | 4.53 |
|           | 71.53 | 5.34 | 3.31 | 4.66 |
| <b>6k</b> | 64.35 | 5.05 | 4.41 | 5.99 |
|           | 64.59 | 4.98 | 4.38 | 6.11 |
| <b>6l</b> | 70.22 | 5.12 | 3.56 | 4.83 |
|           | 70.55 | 5.08 | 3.66 | 4.77 |
| <b>7a</b> | 69.04 | 4.41 | 3.83 | 5.20 |
|           | 68.90 | 4.78 | 3.76 | 5.25 |
| <b>7b</b> | 69.65 | 4.78 | 3.69 | 5.01 |
|           | 69.59 | 4.66 | 3.37 | 4.71 |
| <b>7c</b> | 62.28 | 4.18 | 4.84 | 6.57 |
|           | 62.07 | 4.24 | 4.72 | 6.50 |
| <b>7d</b> | 69.22 | 4.70 | 7.69 | 5.21 |
|           | 68.90 | 4.53 | 7.50 | 5.29 |
| <b>7e</b> | 68.73 | 4.33 | 3.34 | 4.53 |
|           | 68.76 | 4.23 | 2.98 | 4.61 |
| <b>7f</b> | 68.15 | 3.98 | 3.46 | 4.69 |
|           | 67.85 | 4.12 | 3.31 | 4.55 |
| <b>7g</b> | 62.97 | 4.11 | 4.08 | 5.53 |
|           | 62.96 | 4.30 | 4.18 | 5.73 |

|           |       |      |       |      |
|-----------|-------|------|-------|------|
| <b>7h</b> | 70.58 | 4.64 | 3.58  | 4.85 |
|           | 70.91 | 4.30 | 3.71  | 4.97 |
| <b>7i</b> | 64.76 | 4.48 | 4.44  | 6.03 |
|           | 64.70 | 4.51 | 4.49  | 6.15 |
| <b>7j</b> | 70.58 | 4.64 | 5.58  | 4.85 |
|           | 70.40 | 4.57 | 5.51  | 4.76 |
| <b>7k</b> | 62.28 | 4.18 | 4.84  | 6.57 |
|           | 61.98 | 4.23 | 4.63  | 6.66 |
| <b>7l</b> | 69.04 | 4.41 | 3.38  | 5.20 |
|           | 68.70 | 4.33 | 3.41  | 5.16 |
| <b>7m</b> | 60.00 | 3.85 | 16.46 | 5.58 |
|           | 60.10 | 3.70 | 16.71 | 5.68 |
